# Supplementary material
Source: Springer Nature journal article supplement (https://www.springermedizin.de/resource/supplementary/12990_2008_194_MOESM5_ESM.pdf/9612760)
Supplement: MOESM5 [file 9612760]

**A**

## Effect of PTX on cannabinoid supraspinal analgesia

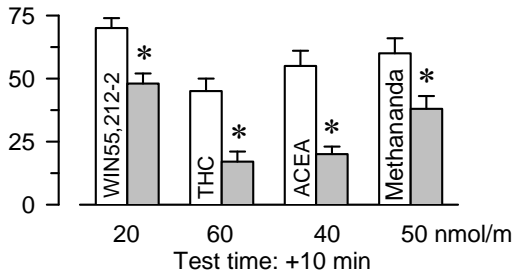

## WIN55,212-2 20 nmol/mouse

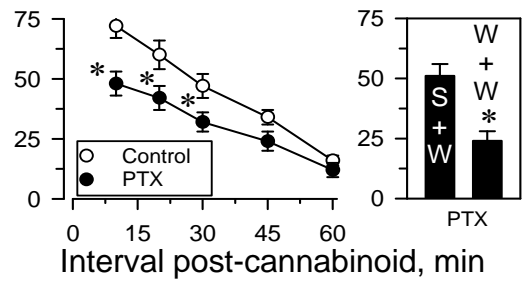**B**

## WIN55,212-2 20 nmol/mouse

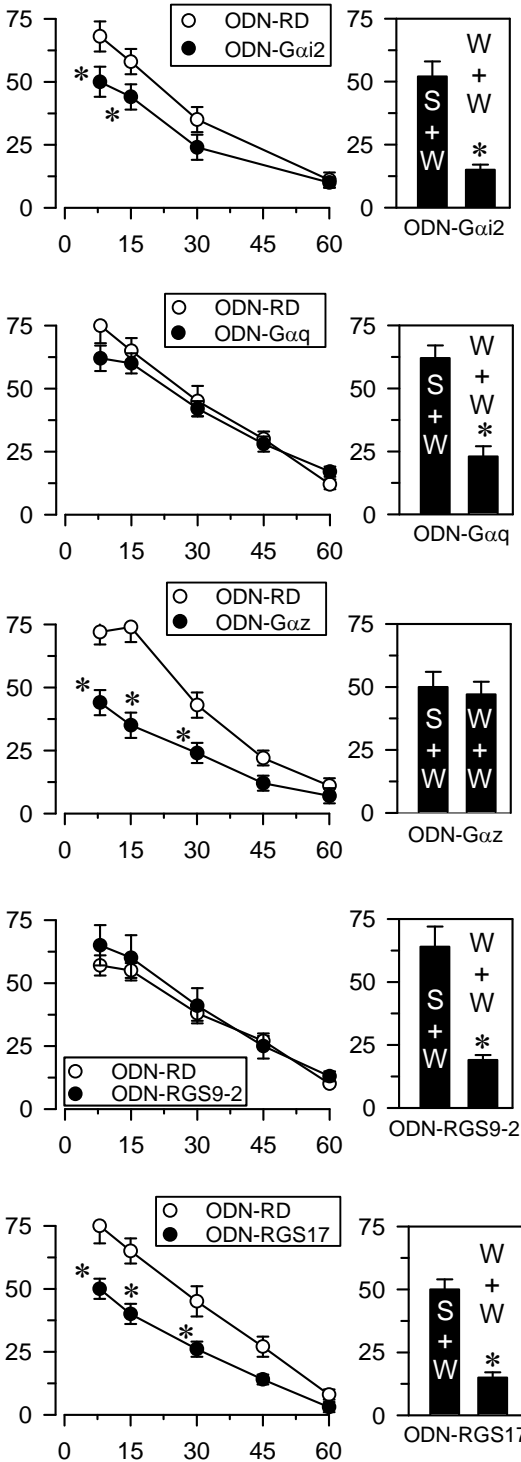**C**

## Effect Gz KD on cannabinoid supraspinal analgesia

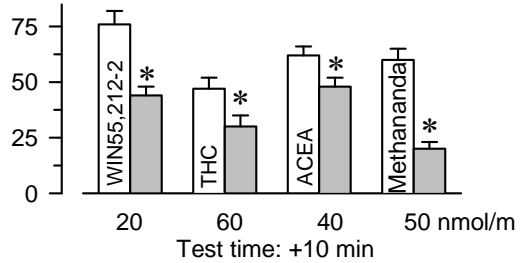**D**

## Morphine, 10 nmols/mouse

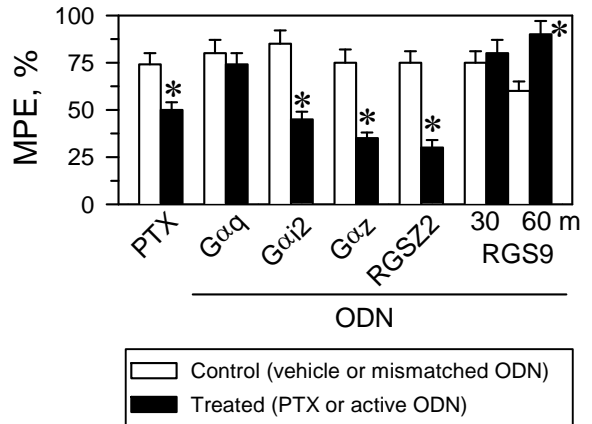**E**

## Morphine, 10 nmols/m

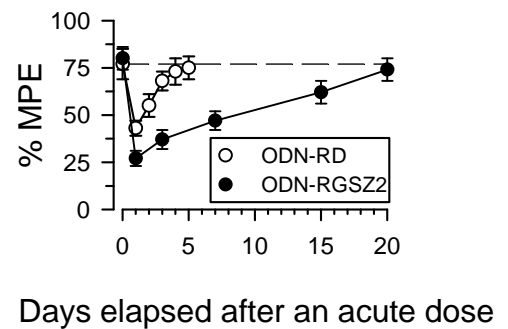

Maximum Possible Effect, %

Interval post-cannabinoid, min
